# Supplementary material
Source: PubMed Central journal article supplement (PMC2933346)
Supplement: mmc1.pdf [file mmc1.pdf]

## Supplemental Data

### A Mutation in *ZNF513*, a Putative Regulator of Photoreceptor Development,

### Causes Autosomal-Recessive Retinitis Pigmentosa

Lin Li, Naoki Nakaya, Venkata R.M. Chavali, Zhiwei Ma, Xiaodong Jiao, Paul Sieving, Sheikh Riazuddin, Stanislav I. Tomarev, Radha Ayyagari, S. Amer Riazuddin, and J. Fielding Hejtmancik

Table S1. Primers used for sequencing *ZNF513*.

| Primer name           | Primer 5'-3'         |
|-----------------------|----------------------|
| ZNF513-E1-Forward     | ctgagaggaagggcagacag |
| ZNF513-E1-Reverse     | tcgtcgagggagtcttcagt |
| ZNF513-E2-Forward     | ggcgatccagactcctagc  |
| ZNF513-E2-Reverse     | aaccagccctcggttgtg   |
| ZNF513-E3a-Forward    | agcaagtggggagaccataa |
| ZNF513-E3a-Reverse    | tftggcctcgggtgtctt   |
| ZNF513-E3b,4a-Forward | ctaccgctgtccccactg   |
| ZNF513-E3b,4a-Reverse | ggtgccgttcaggttatc   |
| ZNF513-E4b-Forward    | ccctttgccactcactatcc |
| ZNF513-E4b-Reverse    | tgggctggtccttatagtgc |
